# Supplementary material for: A biochemical landscape of A-to-I RNA editing in the human brain transcriptome
Source: HighWire-hosted journal article supplement (doi:10.1101/gr.162537.113), 2014-01-09
Supplement: TableS11_44_RDD_sites_validated_by_ICE_method.xlsx [file TableS11_44_RDD_sites_validated_by_ICE_method.xlsx]

## Sheet: Table
ICEcheck	chromosome	pos(hg19)	strand	genesymbol	old genesymbol or ACCESSION ID	utrflg	# reads of edited (Bahn et al. 2012)	# read total (Bahn et al. 2012)	Gratio (Bahn et al. 2012)	log likelihood ratio (Bahn et al. 2012)	repeat family	repeat class	repeat name	L1 primer	R1 primer	L2 primer	R2 primer
False positive (unedited)	chr1	1157960	-	SDF4		Intron	4	6	0.67	9.22622				CTCTTCACGCAGAGGCACCAG	TGGGGAGCGTGTGAGCTGT	TTCACGCAGAGGCACCAGCTT	GGAGCGTGTGAGCTGTGCC
False positive (unedited)	chr1	8967792	-		RP3-477M7.5	EST	6	6	1	16.393				TTTGTCACAGTTTTGAGGTCTCC	ACAGACAGGAGTCATTGATTCAGA	GTCACAGTTTTGAGGTCTCCTTT	GACAGGAGTCATTGATTCAGATTA
Positive (edited)	chr1	44452987	+	B4GALT2		Intron	4	12	0.33	7.41164				GCATCTGGGGAGGAGTGGAG	TCCCAGATTTTAGGCAACAGCA	TCTGGGGAGGAGTGGAGCTC	CAGATTTTAGGCAACAGCAACT
Positive (edited)	chr1	114258020	-	PHTF1		Intron	4	9	0.44	8.25012	SINE	Alu	AluJb	CCATTCAATGCACAGACACTAATGA	GGCTCACTGCAAACTCCACCT	TTCAATGCACAGACACTAATGAACA	TCACTGCAAACTCCACCTCCT
Positive (edited)	chr1	155704057	+	DLGAP3	DAP3	Intron	5	8	0.63	11.3291	SINE	Alu	AluJr	AGGCTGTAGTGGGCCCTGATT	AGCACTTTAGGAGGCCGAGGT	CTGTAGTGGGCCCTGATTTTG	ACTTTAGGAGGCCGAGGTGGG
False positive (unedited)	chr1	157680047	+		RP11-367J7.4	no annotation	7	7	1	18.9587				TGAGGAAAATGGGCTGGAGAG	TGGCAAAGTTGGGCTGGTAAG	GGAAAATGGGCTGGAGAGAAG	CAAAGTTGGGCTGGTAAGCAC
False positive (unedited)	chr1	158424827	+		RP11-144L1.2	no annotation	7	7	1	18.7968				GGTCAGCTGGTTAGTCTCCTGC	CAGAAGTGGAGCTGCTCAGGAC	CAGCTGGTTAGTCTCCTGCATA	AAGTGGAGCTGCTCAGGACAGA
Positive (edited)	chr1	214524556	-	PTPN14		3'UTR	6	19	0.32	11.2626	SINE	Alu	AluSg	TTGATCCATAAAGCAGATGGGG	TGGGACTGTTGTGTGCTGTCA	ATCCATAAAGCAGATGGGGAAA	GACTGTTGTGTGCTGTCACCC
Positive (edited)	chr1	214529740	-	PTPN14		3'UTR	9	18	0.5	19.1118				CTTGGCCTTTCAAAGTGCTGG	TCTTCCTATGGCTTCATTGGTCA	GGCCTTTCAAAGTGCTGGGAT	TCCTATGGCTTCATTGGTCAGTG
Positive (edited)	chr2	27005724	+	CENPA		no annotation	3	5	0.6	6.74749	SINE	Alu	AluJo	TCAAGTGATCCTCCTGCCTCA	GTATCACACACCTTGGCTATATGGT	AGTGATCCTCCTGCCTCAGCC	TCACACACCTTGGCTATATGGTATA
Positive (edited)	chr2	95811170	-	MRPS5		no annotation	5	5	1	13.1039	LTR	ERV1	MER4D	ATGATGGGAATGGGTGGTCAG	GATTGGCAGTGGGTTTATCCAA	ATGGGAATGGGTGGTCAGACA	TGGCAGTGGGTTTATCCAAAGA
False positive (unedited)	chr2	118868030	+	INSIG2		EST	3	5	0.6	6.11029	DNA	TcMar	Tigger2a	TGGGAAGCCTTACCAATAAG	CCACACACAGTTGACCCTTG	GGGAAGCCTTACCAATAAGAAAC	CACACAGTTGACCCTTGAAC
False positive (unedited)	chr3	9858381	+	TTLL3		Intron	2	5	0.4	4.10215	SINE	Alu	AluSx	GACCCATTCTGTCTTACCTGGG	CCCACACCAATAATATAATGGCAGG	CCATTCTGTCTTACCTGGGTTT	ACACCAATAATATAATGGCAGGTCA
False positive (unedited)	chr3	9858384	+	TTLL3		Intron	2	5	0.4	4.10215	SINE	Alu	AluSx	GACCCATTCTGTCTTACCTGGG	CCCACACCAATAATATAATGGCAGG	CCATTCTGTCTTACCTGGGTTT	ACACCAATAATATAATGGCAGGTCA
False positive (unedited)	chr3	9858433	+	TTLL3		Intron	8	9	0.89	20.4785	SINE	Alu	AluSx	GACCCATTCTGTCTTACCTGGG	CCCACACCAATAATATAATGGCAGG	CCATTCTGTCTTACCTGGGTTT	ACACCAATAATATAATGGCAGGTCA
Positive (edited)	chr5	114542329	-		CTC-428G20.3	INTER	2	7	0.29	3.84591				AAGCACCAGTAATCTCAATAGCACTT	CCAGCCATATCCGACACTAAAACA	CACCAGTAATCTCAATAGCACTTACT	GCCATATCCGACACTAAAACATAC
False positive (unedited)	chr5	141521459	+	NDFIP1		Intron	3	5	0.6	7.10221	SINE	Alu	AluJr4	CCTCACTGTGCTTCTGTGACATC	TTCACTGCAGGCTCCAACTCC	CACTGTGCTTCTGTGACATCAGT	ACTGCAGGCTCCAACTCCTGG
Positive (edited)	chr7	65623014	+		AC008267.2	no annotation	2	7	0.28	3.5319	SINE	Alu	AluSz	TTTCCCAGACAAGGCTTTTGC	TCCATCCTAATAACCCCAAGAAGTC	CCCAGACAAGGCTTTTGCTTT	ATCCTAATAACCCCAAGAAGTCTTA
Positive (edited)	chr8	66642966	-	PDE7A		Intron	2	5	0.4	3.99348	SINE	Alu	AluSz	CCCTCCCCATCCAAGGAAATA	GATGGAGTCTCACTCTGTCGCC	TCCCCATCCAAGGAAATATTG	GGAGTCTCACTCTGTCGCCCAG
Positive (edited)	chr8	67597246	+	SGK3		Intron	2	5	0.4	3.99349	SINE	Alu	AluSq2	GCTAGAGTGCAATGGTGCGAT	TGTCTGAGAAACTGTTTGCTATTTT	AGAGTGCAATGGTGCGATCAC	CTGAGAAACTGTTTGCTATTTTTAG
False positive (unedited)	chr9	34922712	-		RP11-392A14.3	no annotation	10	10	1	27.1929				CGGCAACCTCAGCCAAGTAAT	GAGCTGGTTCAGAAGGCCAAA	CAACCTCAGCCAAGTAATGGT	CTGGTTCAGAAGGCCAAACTG
Positive (edited)	chr9	114800928	-	MIR3134		Intron	6	6	1	16.3174	SINE	Alu	AluJr4	TAGGGCAGCCAGAAGACTTGG	TCACCTTCTGGGTACAATGCAGA	GGCAGCCAGAAGACTTGGCCC	CCTTCTGGGTACAATGCAGAAAA
Positive (edited)	chr9	132272984	+		RP11-492E3.1	Intron	14	14	1	38.0399	SINE	Alu	AluJb	CTGCCCTCTGACCAAGCATTT	ATCTTGCTCTGTCACCCAGGC	CCCTCTGACCAAGCATTTCCA	TTGCTCTGTCACCCAGGCTGG
False positive (unedited)	chr11	843927	+	TSPAN4		Intron	13	23	0.57	29.7487				GAGGTGGGCTGTGGGGGT	CTTCTGCCCAGAGCAGGATGT	GTGGGCTGTGGGGGTGGG	CTGCCCAGAGCAGGATGTGCG
Positive (edited)	chr11	47190210	-	ARFGAP2		Intron	4	7	0.57	8.69684	SINE	Alu	AluSx4	TTCCACGTAGGAGTTCCCTGG	TACAACACGAGCCAGGCACAG	CACGTAGGAGTTCCCTGGCCA	AACACGAGCCAGGCACAGTGG
Positive (edited)	chr11	61581626	-	FADS1		Intron	4	7	0.57	9.15123	LTR	ERV1	LTR12B	AAAAAGGCTGCTCCCCCTCAC	TTAGTGGTTCCCCTCAGCCAA	AAGGCTGCTCCCCCTCACACC	GTGGTTCCCCTCAGCCAATGC
Positive (edited)	chr12	113719456	-	TPCN1		Intron	4	6	0.67	9.49079	SINE	Alu	AluJb	CAATTGCAAAGCAATCCCAATG	AACACAAGGCCAAGCACACTG	TTGCAAAGCAATCCCAATGATA	ACAAGGCCAAGCACACTGGCT
False positive (unedited)	chr12	122629864	+	MLXIP		INTER	29	63	0.46	59.6611				TTTGAAGGATTTTACCGCAGG	CCCAACGTCAGCAACAGACAG	GAAGGATTTTACCGCAGGAAG	AACGTCAGCAACAGACAGAGG
False positive (unedited)	chr12	124109944	-	EIF2B1		Intron	2	8	0.25	3.62271	SINE	Alu	AluJb	TCTGATGAGATCTGAAGTTGGACAAA	TGTGTTCAAAAGTAAGGATTTTGAGG	GATGAGATCTGAAGTTGGACAAAAGT	GTTCAAAAGTAAGGATTTTGAGGAAT
False positive (unedited)	chr14	24594299	+	DCAF11		3'UTR	2	6	0.33	3.98889	SINE	Alu	AluJb	CGGGTGCCTGTAATCTCAGCTA	GAATGAGAACACAGAAGCCAAGGA	GTGCCTGTAATCTCAGCTACTT	TGAGAACACAGAAGCCAAGGATCT
Positive (edited)	chr14	45601738	-	FKBP3		Intron	6	7	0.86	15.7397	SINE	Alu	AluSx3	GGTCTAAGTGTTAATGATCACC	ATCACGAGGTCAGGAGATCG	GTCTAAGTGTTAATGATCACCGG	CACGAGGTCAGGAGATCGAG
Positive (edited)	chr14	45601765	-	FKBP3		Intron	2	8	0.25	3.74617	SINE	Alu	AluSx3	GGTCTAAGTGTTAATGATCACC	ATCACGAGGTCAGGAGATCG	GTCTAAGTGTTAATGATCACCGG	CACGAGGTCAGGAGATCGAG
Positive (edited)	chr15	25217221	+	SNRPN		Intron	3	5	0.6	6.87614	SINE	Alu	AluSx1	TTGCTCATTCACAGTCATGATCC	AGAGTCTCACTCTGTTGCCCA	CTCATTCACAGTCATGATCCTTG	GTCTCACTCTGTTGCCCAGGC
False positive (unedited)	chr15	89175173	+	AEN		3'UTR	36	66	0.55	81.0628				AGACAGAACTGCTCCGGCTTG	TGACATCAGCTACCGACTTTTAAGG	CAGAACTGCTCCGGCTTGGCT	CATCAGCTACCGACTTTTAAGGAAT
False positive (unedited)	chr16	27278365	-	NSMCE1		Intron	14	14	1	37.1749				GGGCTCATAAAATAAGGCATAATG	GCCTTCGAAAAGGTTTTTTTAATTG	GGCTCATAAAATAAGGCATAATGTG	CCTTCGAAAAGGTTTTTTTAATTGG
False positive (unedited)	chr16	69733755	+	NFAT5		3'UTR	4	19	0.21	6.44264	SimpleRepeat	SimpleRepeat	(TG)n	GAGCCAGCAAAGGCCATAGAA	AAGCCCTTAAAAACTTGTTCTTTTT	CCAGCAAAGGCCATAGAAACA	CCCTTAAAAACTTGTTCTTTTTTTA
Positive (edited)	chr17	79528748	-	NPLOC4		Intron	4	7	0.57	8.72692	SINE	Alu	AluJb	CCCAAGGCCCTGAAGAGATTC	AACTATGAAGCAGGCTGGGCA	AAGGCCCTGAAGAGATTCAAC	TATGAAGCAGGCTGGGCATGA
Positive (edited)	chr17	80585936	-	WDR45B	WDR45L	Intron	4	5	0.8	9.81268	SINE	Alu	AluJb	TGCATCAGGAAGGGAGGTTTC	TTAAAAAGGAGCAGGGGCTGG	ATCAGGAAGGGAGGTTTCAGT	AAAAGGAGCAGGGGCTGGGTG
Positive (edited)	chr19	1916603	+	SCAMP4		Intron	5	7	0.71	10.8623	SINE	Alu	AluJo	TTTCTGGCCTCCAGGACTGTT	GCTGTGAGAAACCACCACCG	CTGGCCTCCAGGACTGTTAGC	GTGAGAAACCACCACCGACT
Positive (edited)	chr19	36609435	+	TBCB		Intron	6	9	0.67	13.0725	SINE	Alu	AluSx1	GATGCATCAGTGACGTCTGGG	ACCCCTTCCCCATCTTCAGTT	GCATCAGTGACGTCTGGGAGG	CCTTCCCCATCTTCAGTTAAC
Positive (edited)	chr19	41872943	+	TMEM91		Intron	4	5	0.8	9.16496	SINE	Alu	AluSx	GTGGTTCATGCCCGTAATCCC	TGTACTGGTCCTGTAGCCTGGAA	GTTCATGCCCGTAATCCCAGC	ACTGGTCCTGTAGCCTGGAATAA
False positive (unedited)	chr20	44524444	+	CTSA		Intron	6	20	0.3	11.0783	SINE	Alu	AluJr	GCCCCATTTCATTACGTAGCC	CTCAGGTGATTCCCCCACCT	CCATTTCATTACGTAGCCACA	AGGTGATTCCCCCACCTCAG
Positive (edited)	chrX	46463953	-	SLC9A7		3'UTR	5	5	1	13.4913	SINE	Alu	AluJb	CTTCCAAAGCCCATGGATGAC	AGGCTGAGGCAGGAGGATCA	CCAAAGCCCATGGATGACCAT	CTGAGGCAGGAGGATCACTT
False positive (unedited)	chrX	48852761	-	GRIPAP1		Intron	4	5	0.8	9.86173	SINE	Alu	AluSp	CAAGATTTTAATCTAGGCCTTCTGG	CCAAGTAGCTGGAAGTACAGGCA	GATTTTAATCTAGGCCTTCTGGTTC	AGTAGCTGGAAGTACAGGCATAT

## Sheet: Field
ICEcheck	ICE method validation of candidate editing sites in U87MG : Positive=edited, False postive=unedited
chr
chromosome
pos (hg19)
strand	Chromosome strand
genesymbol
utrflg	Location in genes. (5'UTR/CDS/3'UTR/Intron/EST/no annotation)
# reads of edited (Bahn et al. 2012)	number of reads containing edited sequence in RNA-seq of U87MG cell reported by Bahn et al. (2012)
# read total (Bahn et al. 2012)	number of total reads in RNA-seq of U87MG cell reported by Bahn et al. (2012)
Gratio (Bahn et al. 2012)	Predicted editing ratio in U87MG cell reported by Bahn et al. (2012)
log likelihood ratio (Bahn et al. 2012)	Statistical score which represents the likelihood of putative editing sites calculated by Bahn et al. (2012)
repeat family	Repeat family name from repeatmasker
repeat class	Repeat class name from repeatmasker
repeat name	Detailed repeat name
L1 primer	Forward primer sequence for 1st PCR
R1 primer	Reverse primer sequence for 1st PCR
L2 primer	Forward primer sequence for 2nd PCR
R2 primer	Reverse primer sequence for 2nd PCR
